# Supplementary material for: Dimeric 1,3-propanediaminetetraacetato lanthanides as the precursors of catalysts for the oxidative coupling of methane
Source: Royal Society of Chemistry journal article supplement (doi:10.1039/c4dt00104d), 2014-01-01
Supplement: c4dt00104d1.pdf [file c4dt00104d1.pdf]

## Dimeric 1,3-propanediaminetetraacetato lanthanides as the precursors of catalysts for the oxidative coupling of methane

Mao-Long Chen, Yu-Hui Hou, Wen-Sheng Xia, Wei-Zheng Weng, Ze-Xing Cao\*, Zhao-Hui Zhou\*, Hui-Lin Wan

*State Key Laboratory of Physical Chemistry of Solid Surfaces, College of Chemistry and Chemical Engineering, Xiamen University, Xiamen, 361005, China, Fax: +86 592 2183047; Tel: +86 592 2184531; E-mail: zxcao@xmu.edu.cn, zhzhou@xmu.edu.cn*

|                                                                                                                                                                                                                                                                  |   |
|------------------------------------------------------------------------------------------------------------------------------------------------------------------------------------------------------------------------------------------------------------------|---|
| <b>Fig. S1</b> Anion structure of dimeric complex $(\text{NH}_4)_2[\text{Ce}_2(\text{pdta})_2(\text{H}_2\text{O})_4] \cdot 8\text{H}_2\text{O}$ ( <b>2</b> ) in 30% thermal ellipsoids .....                                                                     | 2 |
| <b>Fig. S2</b> Anion structure of dimeric complex $\text{K}_2[\text{La}_2(\text{pdta})_2(\text{H}_2\text{O})_4] \cdot 11\text{H}_2\text{O}$ ( <b>3</b> ) in 30% thermal ellipsoids .....                                                                         | 2 |
| <b>Fig. S3</b> Anion structure of dimeric complex $\text{K}_2[\text{Ce}_2(\text{pdta})_2(\text{H}_2\text{O})_4] \cdot 11\text{H}_2\text{O}$ ( <b>4</b> ) in 30% thermal ellipsoids .....                                                                         | 3 |
| <b>Fig. S4</b> 3D supramolecular network of $[\text{La}_2(1,3\text{-pdta})_2(\text{H}_2\text{O})_4]_n \cdot [\text{Sr}_2(\text{H}_2\text{O})_6]_n \cdot [\text{La}_2(1,3\text{-pdta})_2(\text{H}_2\text{O})_2]_n \cdot 18n\text{H}_2\text{O}$ ( <b>5</b> ) ..... | 3 |
| <b>Fig. S5</b> $^1\text{H}$ NMR spectrum of $\text{H}_4\text{pdta}$ in $\text{D}_2\text{O}$ , DSS was used as an internal reference. ....                                                                                                                        | 4 |
| <b>Fig. S6</b> $^1\text{H}$ NMR spectrum of $(\text{NH}_4)_2[\text{La}_2(\text{pdta})_2(\text{H}_2\text{O})_4] \cdot 8\text{H}_2\text{O}$ ( <b>1</b> ) in $\text{D}_2\text{O}$ , DSS was used as an internal reference. ....                                     | 4 |
| <b>Fig. S7</b> IR spectrum of $(\text{NH}_4)_2[\text{La}_2(1,3\text{-pdta})_2(\text{H}_2\text{O})_4] \cdot 8\text{H}_2\text{O}$ ( <b>1</b> ) .....                                                                                                               | 5 |
| <b>Fig. S8</b> IR spectrum of $(\text{NH}_4)_2[\text{Ce}_2(1,3\text{-pdta})_2(\text{H}_2\text{O})_4] \cdot 8\text{H}_2\text{O}$ ( <b>2</b> ) .....                                                                                                               | 5 |
| <b>Fig. S9</b> IR spectrum of $\text{K}_2[\text{La}_2(1,3\text{-pdta})_2(\text{H}_2\text{O})_4] \cdot 11\text{H}_2\text{O}$ ( <b>3</b> ) .....                                                                                                                   | 6 |
| <b>Fig. S10</b> IR spectrum of $\text{K}_2[\text{Ce}_2(1,3\text{-pdta})_2(\text{H}_2\text{O})_4] \cdot 11\text{H}_2\text{O}$ ( <b>4</b> ) .....                                                                                                                  | 6 |
| <b>Fig. S11</b> IR spectrum of $[\text{La}_2(1,3\text{-pdta})_2(\text{H}_2\text{O})_4]_n \cdot [\text{Sr}_2(\text{H}_2\text{O})_6]_n \cdot [\text{La}_2(1,3\text{-pdta})_2(\text{H}_2\text{O})_2]_n \cdot 18n\text{H}_2\text{O}$ ( <b>5</b> ) .....              | 7 |
| <b>Fig. S12</b> TG-DTG curves of $(\text{NH}_4)_2[\text{La}_2(1,3\text{-pdta})_2(\text{H}_2\text{O})_4] \cdot 8\text{H}_2\text{O}$ ( <b>1</b> ) .....                                                                                                            | 8 |

**Table S1** The catalytic performances of thermal decomposition products from **1** and **5** in oxidative coupling of methane ( $\text{CH}_4/\text{O}_2 = 2.8/1$ , GHSV =  $15000 \text{ mL}\cdot\text{g}^{-1}\cdot\text{h}^{-1}$ ).....9

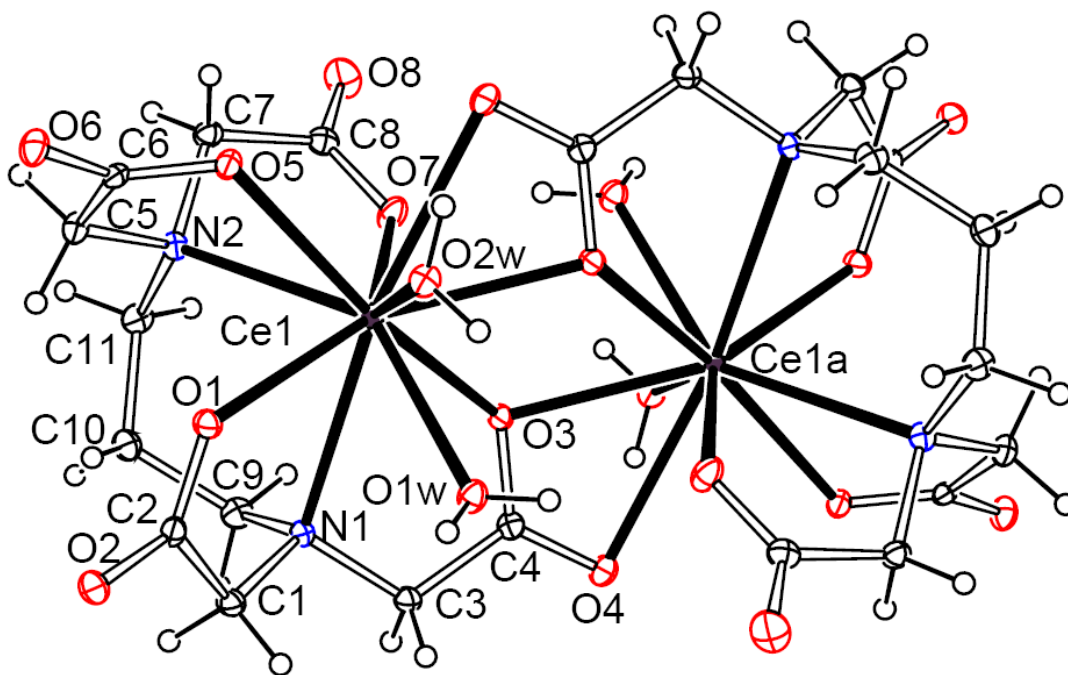

**Fig. S1** Anion structure of dimeric complex  $(\text{NH}_4)_2[\text{Ce}_2(\text{pdta})_2(\text{H}_2\text{O})_4] \cdot 8\text{H}_2\text{O}$  (**2**) in 30% thermal ellipsoids

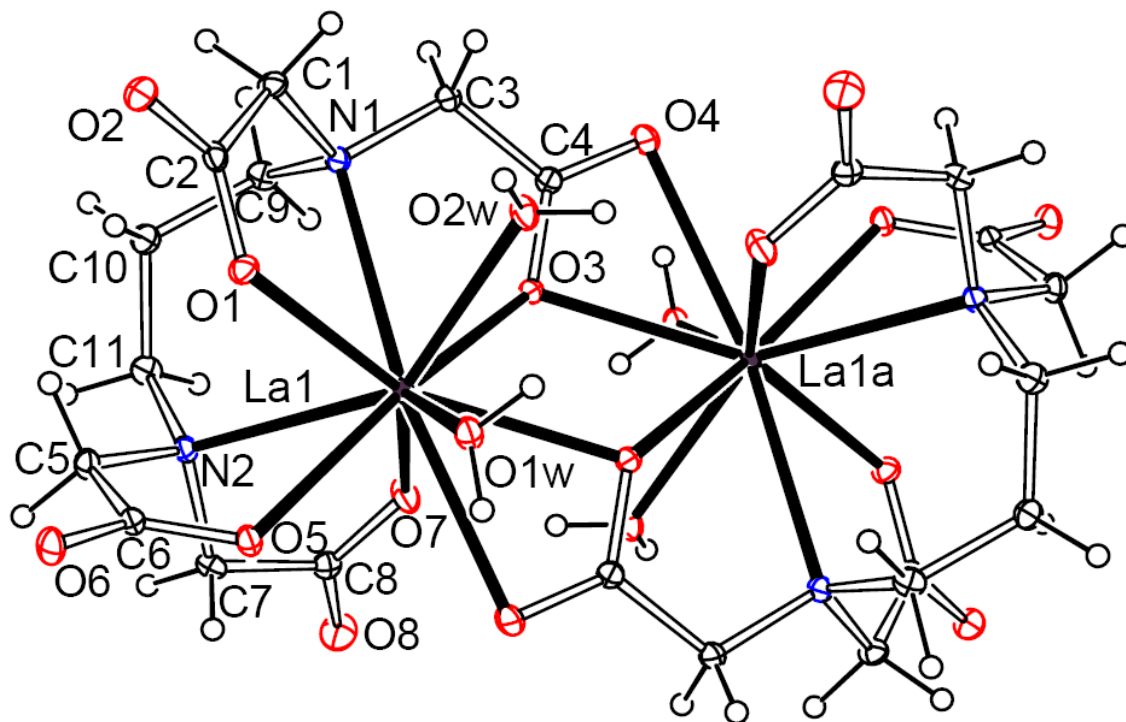

**Fig. S2** Anion structure of dimeric complex  $\text{K}_2[\text{La}_2(\text{pdta})_2(\text{H}_2\text{O})_4] \cdot 11\text{H}_2\text{O}$  (**3**) in 30% thermal

ellipsoids

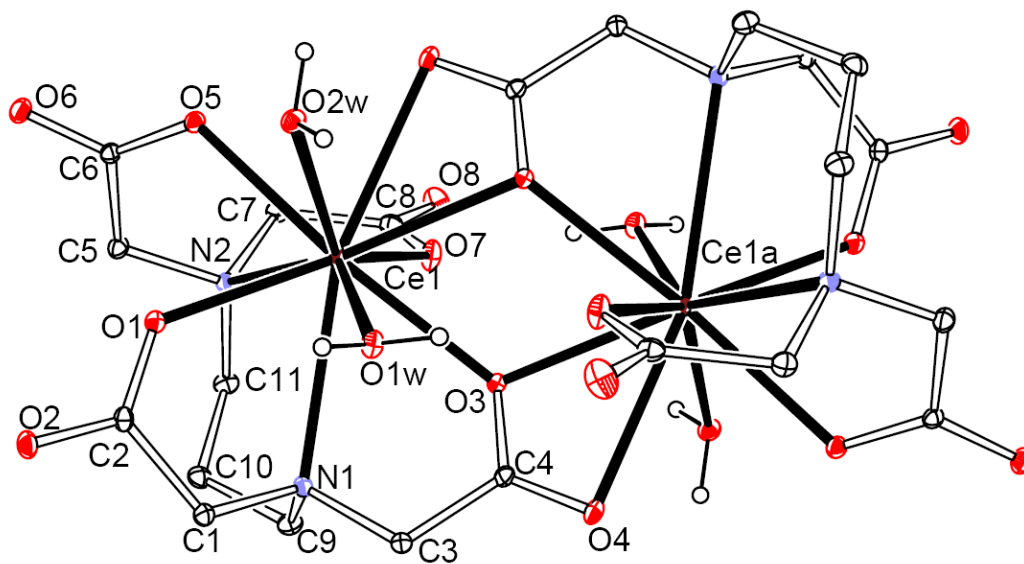

**Fig. S3** Anion structure of dimeric complex  $\text{K}_2[\text{Ce}_2(\text{pdta})_2(\text{H}_2\text{O})_4] \cdot 11\text{H}_2\text{O}$  (**4**) in 30% thermal ellipsoids

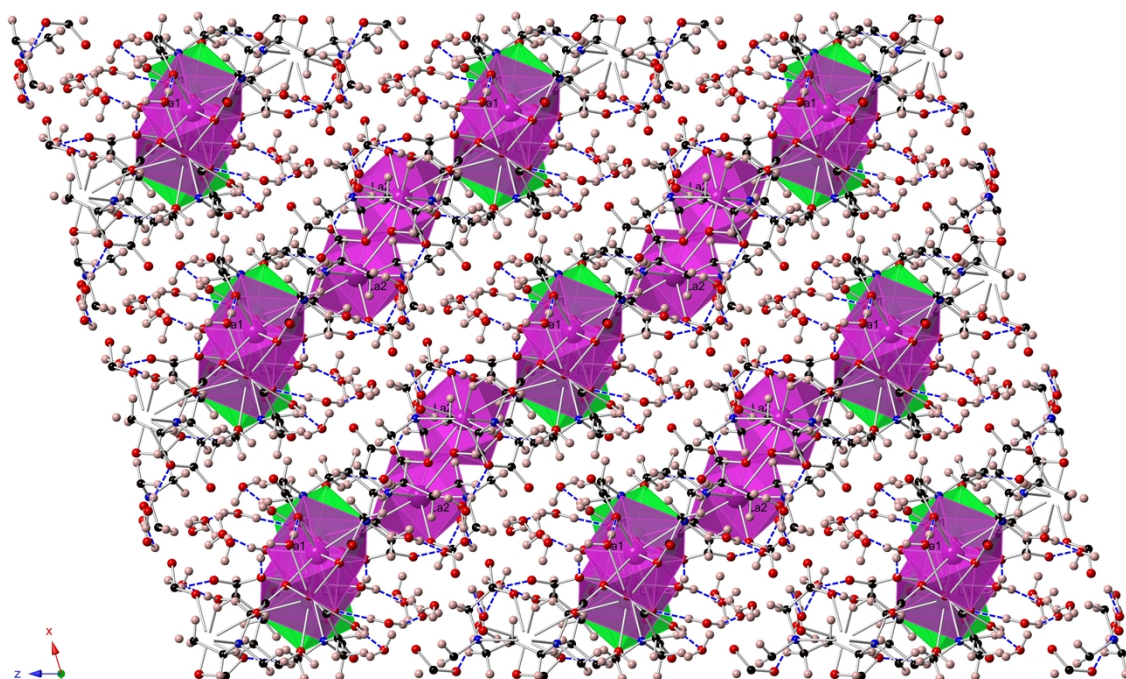

**Fig. S4** 3D supramolecular network of  $[\text{La}_2(1,3\text{-pdta})_2(\text{H}_2\text{O})_4]_n \cdot [\text{Sr}_2(\text{H}_2\text{O})_6]_n \cdot [\text{La}_2(1,3\text{-pdta})_2(\text{H}_2\text{O})_2]_n \cdot 18n\text{H}_2\text{O}$  (**5**)

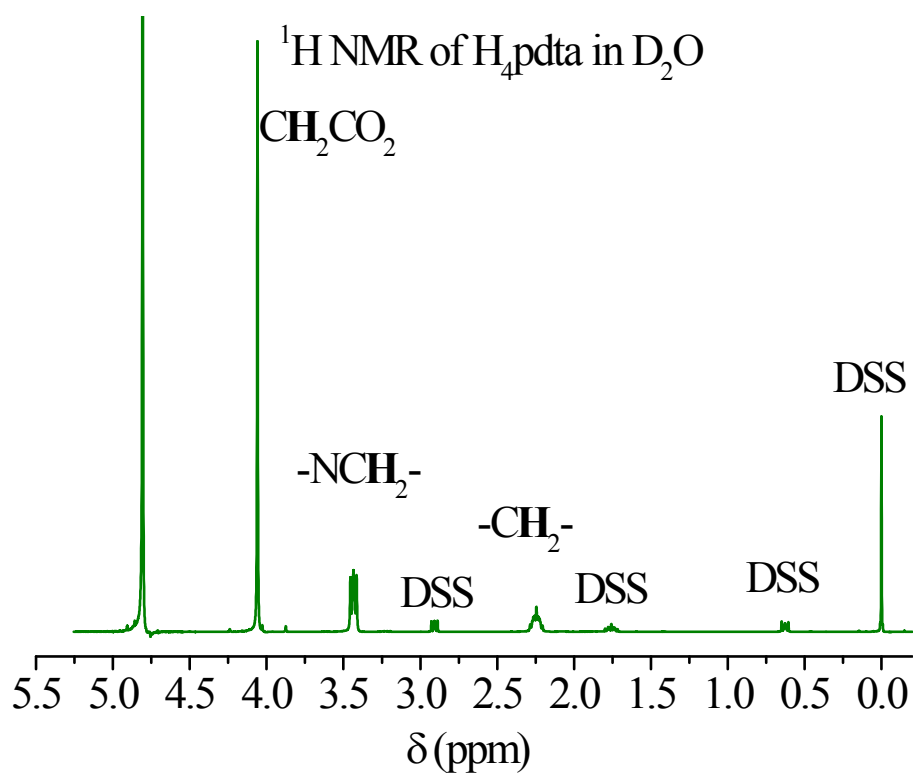

**Fig. S5**  $^1\text{H}$  NMR spectrum of  $\text{H}_4\text{pdta}$  in  $\text{D}_2\text{O}$ , DSS was used as an internal reference.

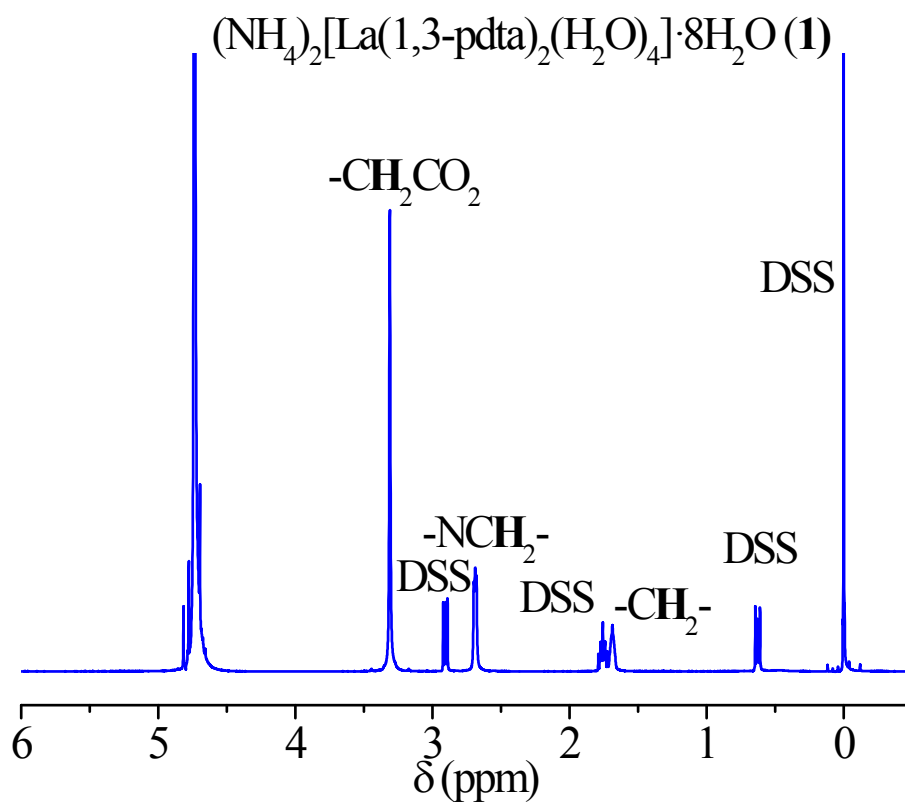

**Fig. S6**  $^1\text{H}$  NMR spectrum of  $(\text{NH}_4)_2[\text{La}_2(\text{pdta})_2(\text{H}_2\text{O})_4] \cdot 8\text{H}_2\text{O}$  (**1**) in  $\text{D}_2\text{O}$ , DSS was used as an internal reference.

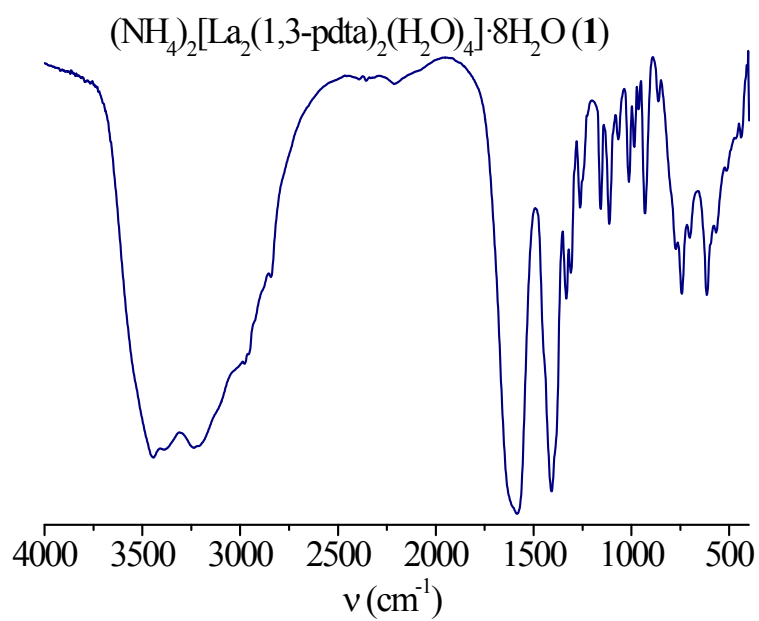

**Fig. S7** IR spectrum of  $(\text{NH}_4)_2[\text{La}_2(1,3\text{-pdta})_2(\text{H}_2\text{O})_4] \cdot 8\text{H}_2\text{O}$  (1)

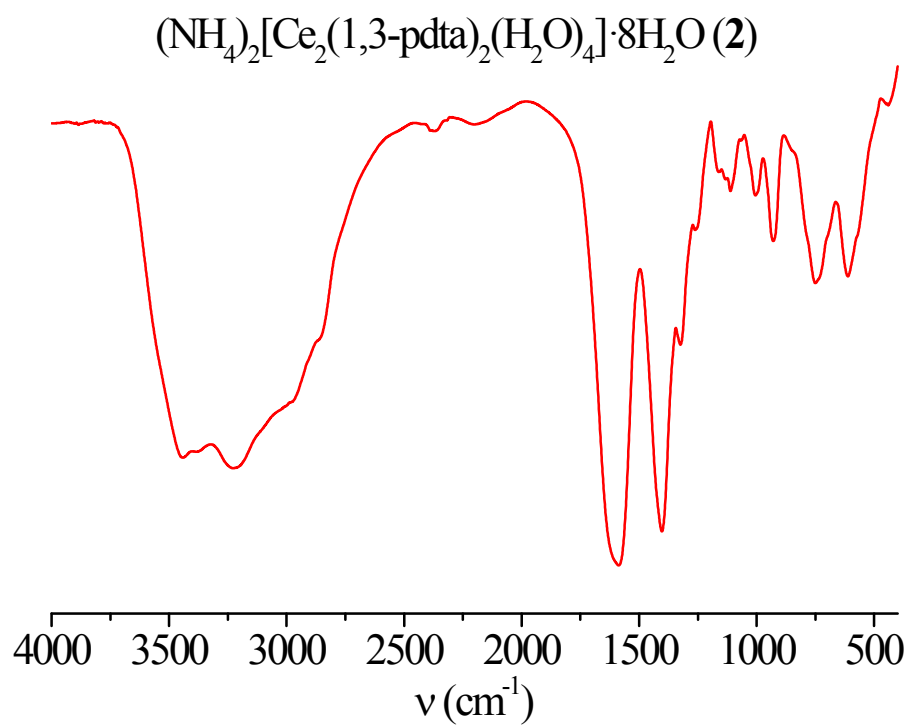

**Fig. S8** IR spectrum of  $(\text{NH}_4)_2[\text{Ce}_2(1,3\text{-pdta})_2(\text{H}_2\text{O})_4] \cdot 8\text{H}_2\text{O}$  (2)



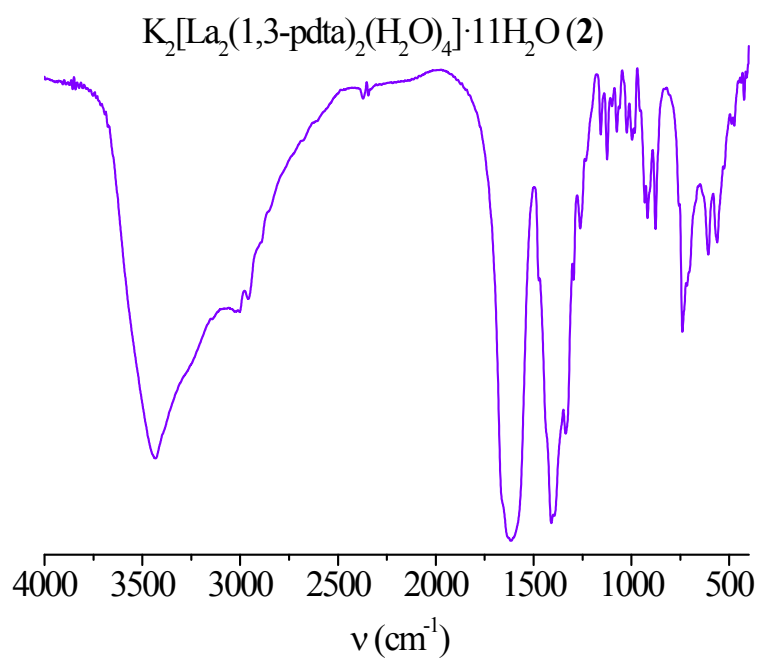

**Fig. S9** IR spectrum of  $\text{K}_2[\text{La}_2(1,3\text{-pdta})_2(\text{H}_2\text{O})_4] \cdot 11\text{H}_2\text{O}$  (3)

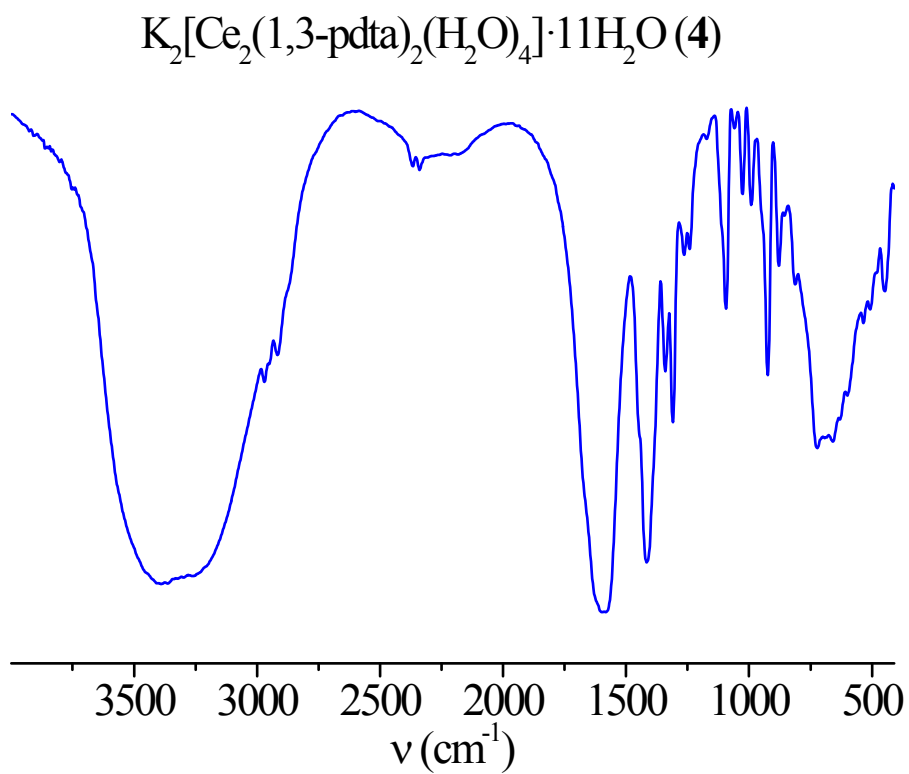

**Fig. S10** IR spectrum of  $\text{K}_2[\text{Ce}_2(1,3\text{-pdta})_2(\text{H}_2\text{O})_4] \cdot 11\text{H}_2\text{O}$  (4)

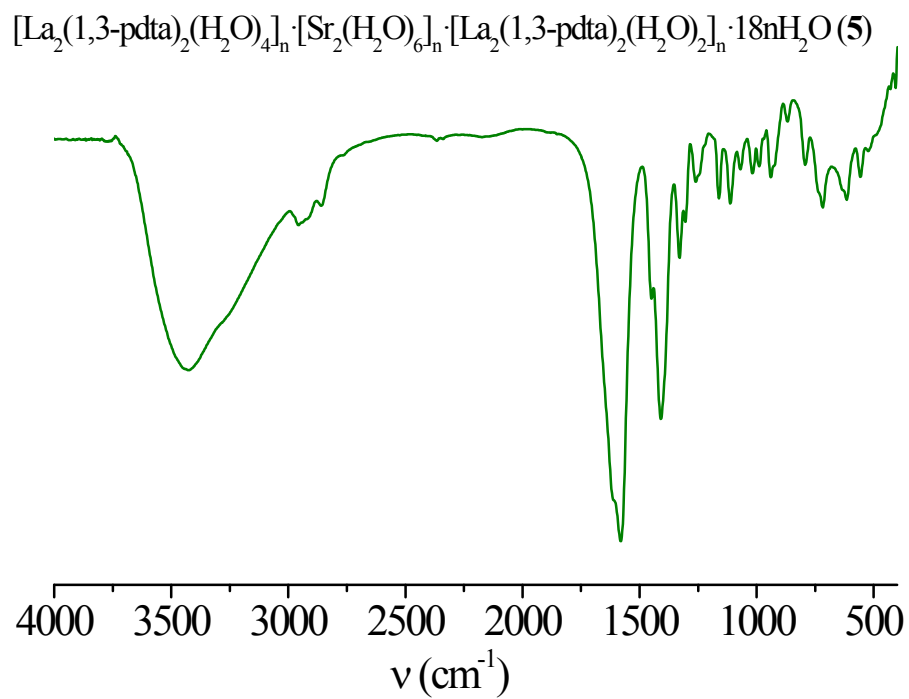

**Fig. S11** IR spectrum of  $[\text{La}_2(1,3\text{-pdta})_2(\text{H}_2\text{O})_4]_n \cdot [\text{Sr}_2(\text{H}_2\text{O})_6]_n \cdot [\text{La}_2(1,3\text{-pdta})_2(\text{H}_2\text{O})_2]_n \cdot 18n\text{H}_2\text{O}$  (**5**)

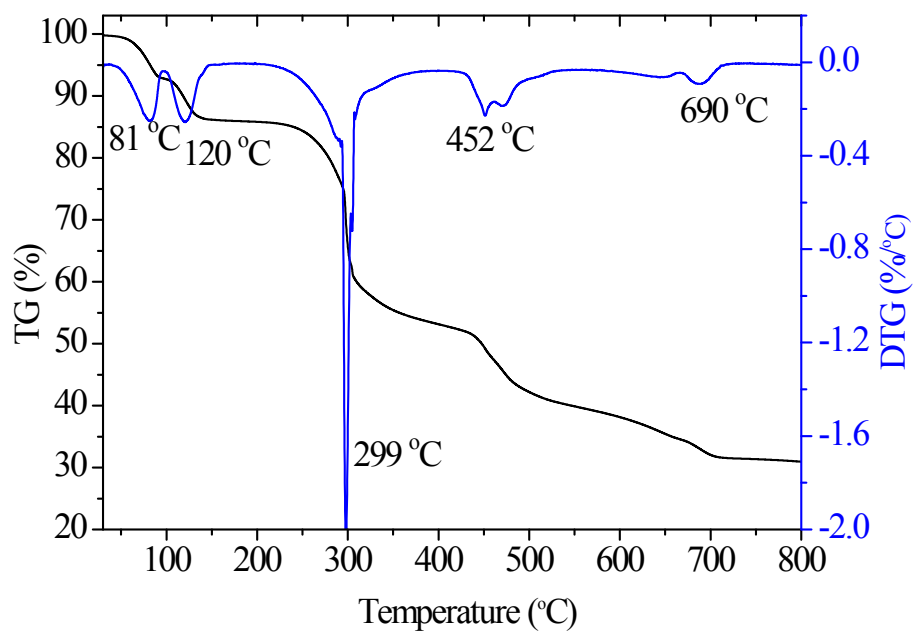

**Fig. S12** TG-DTG curves of  $(\text{NH}_4)_2[\text{La}_2(1,3\text{-pdta})_2(\text{H}_2\text{O})_4] \cdot 8\text{H}_2\text{O}$  (1)

**Table S1** The catalytic performances of thermal decomposition products from **1** and **5** in oxidative coupling of methane ( $\text{CH}_4/\text{O}_2 = 2.8/1$ , GHSV =  $15000 \text{ mL}\cdot\text{g}^{-1}\cdot\text{h}^{-1}$ )

| Sample                                                                              | T/°C | Conv $\text{CH}_4/\%$ | Sel $\text{C}_2/\%$ | Yield $\text{C}_2/\%$ |
|-------------------------------------------------------------------------------------|------|-----------------------|---------------------|-----------------------|
| $\text{La}_2\text{O}_2\text{CO}_3$                                                  | 550  | 0.0                   | 0.0                 | 0.0                   |
|                                                                                     | 600  | 13.10                 | 28.38               | 3.72                  |
|                                                                                     | 650  | 17.36                 | 42.37               | 7.35                  |
|                                                                                     | 700  | 23.02                 | 45.75               | 10.53                 |
|                                                                                     | 750  | 29.62                 | 46.57               | 13.79                 |
|                                                                                     | 800  | 29.93                 | 45.61               | 13.65                 |
| $\text{La}_2\text{O}_3$ , $\text{SrCO}_3$<br>and $\text{La}_2\text{O}_2\text{CO}_3$ | 550  | 12.63                 | 24.05               | 3.04                  |
|                                                                                     | 600  | 26.46                 | 47.17               | 12.48                 |
|                                                                                     | 650  | 29.87                 | 46.31               | 13.83                 |
|                                                                                     | 700  | 29.09                 | 50.25               | 14.62                 |
|                                                                                     | 750  | 29.69                 | 51.74               | 15.36                 |
|                                                                                     | 800  | 30.94                 | 50.71               | 15.69                 |
